# Supplementary material for: Frailty in Survival Analysis of Widowhood Mortality
Source: Hindawi journal article supplement (doi:10.1155/2018/2378798), 2018-10-02
Supplement: f1 [file 2378798.f1.zip]

Archive with 3 entries (2 files):
- 2378798.f1/
- 2378798.f1/SuppTable1.pdf
- 2378798.f1/SuppTable2.pdf
