# Supplementary material for: Frailty in Survival Analysis of Widowhood Mortality
Source: Hindawi journal article supplement (doi:10.1155/2018/2378798), 2018-10-02
Supplement: f1 [file 2378798.f1.zip › 2378798.f1/SuppTable1.pdf]

Supplementary Table 1

Observed population hazard ratios (HRs) for widowed individuals compared to married. The HRs are averaged per month by age group and gender. Norway 1975-2006.

| Age in years               | 55-64 | 55-64 | 65-74 | 65-74 | 75-84 | 75-84 | 85-94 | 85-94 |
|----------------------------|-------|-------|-------|-------|-------|-------|-------|-------|
|                            | Men   | Women | Men   | Women | Men   | Women | Men   | Women |
| Months since spousal death |       |       |       |       |       |       |       |       |
| 1                          | 2.198 | 2.183 | 1.818 | 1.586 | 1.598 | 1.531 | 1.520 | 1.539 |
| 2                          | 1.550 | 1.600 | 1.506 | 1.532 | 1.353 | 1.283 | 1.340 | 1.310 |
| 3                          | 1.496 | 1.389 | 1.484 | 1.335 | 1.357 | 1.280 | 1.325 | 1.272 |
| 4                          | 1.859 | 1.398 | 1.531 | 1.291 | 1.357 | 1.330 | 1.292 | 1.263 |
| 5                          | 1.640 | 1.225 | 1.471 | 1.439 | 1.337 | 1.026 | 1.128 | 1.233 |
| 6                          | 1.794 | 1.387 | 1.46  | 1.239 | 1.329 | 1.295 | 1.215 | 1.198 |
| 7                          | 2.156 | 1.641 | 1.448 | 1.427 | 1.292 | 1.261 | 1.289 | 1.352 |
| 8                          | 1.674 | 1.596 | 1.233 | 1.317 | 1.257 | 1.189 | 1.058 | 1.200 |
| 9                          | 1.828 | 1.559 | 1.452 | 1.168 | 1.341 | 1.151 | 1.179 | 1.104 |
| 10                         | 1.310 | 1.172 | 1.310 | 1.244 | 1.270 | 1.146 | 1.062 | 1.144 |
| 11                         | 1.401 | 1.392 | 1.457 | 1.246 | 1.315 | 1.243 | 1.195 | 1.241 |
| 12                         | 1.751 | 0.983 | 1.315 | 1.337 | 1.214 | 1.167 | 1.262 | 1.248 |
| 13                         | 1.753 | 1.319 | 1.443 | 1.282 | 1.162 | 1.187 | 1.186 | 1.248 |
| 14                         | 1.542 | 1.567 | 1.358 | 1.326 | 1.287 | 1.201 | 1.160 | 1.123 |
| 15                         | 1.388 | 0.852 | 1.421 | 1.238 | 1.278 | 1.137 | 1.123 | 1.145 |
| 16                         | 2.027 | 1.818 | 1.438 | 1.256 | 1.262 | 1.212 | 1.226 | 1.176 |
| 17                         | 2.038 | 1.509 | 1.332 | 1.121 | 1.261 | 1.260 | 1.100 | 1.264 |
| 18                         | 1.778 | 1.533 | 1.482 | 1.247 | 1.185 | 1.288 | 1.184 | 1.198 |
| 19                         | 1.618 | 1.448 | 1.249 | 1.182 | 1.161 | 1.218 | 1.221 | 1.275 |
| 20                         | 1.567 | 1.282 | 1.365 | 1.352 | 1.128 | 1.200 | 1.344 | 1.376 |
| 21                         | 0.732 | 1.092 | 1.246 | 1.184 | 1.193 | 1.142 | 1.135 | 1.321 |
| 22                         | 0.904 | 1.507 | 1.570 | 1.069 | 1.282 | 1.222 | 1.067 | 1.182 |
| 23                         | 1.358 | 1.452 | 1.501 | 1.185 | 1.267 | 1.232 | 1.135 | 1.137 |
| 24                         | 1.401 | 1.347 | 1.381 | 1.251 | 1.226 | 1.134 | 1.134 | 1.207 |
| 25                         | 1.255 | 1.299 | 1.344 | 1.322 | 1.133 | 1.226 | 1.154 | 1.280 |
| 26                         | 1.692 | 1.220 | 1.454 | 1.373 | 1.152 | 1.235 | 1.156 | 1.069 |
| 27                         | 1.987 | 1.157 | 1.500 | 1.310 | 1.120 | 1.178 | 1.197 | 1.244 |
| 28                         | 2.399 | 1.421 | 1.386 | 1.262 | 1.291 | 1.142 | 1.244 | 1.304 |
| 29                         | 1.631 | 1.232 | 1.554 | 1.242 | 1.207 | 1.253 | 1.132 | 1.141 |
| 30                         | 1.433 | 1.463 | 1.367 | 1.299 | 1.227 | 1.190 | 1.228 | 1.218 |
| 31                         | 1.626 | 1.108 | 1.439 | 1.311 | 1.198 | 1.218 | 1.275 | 1.214 |
| 32                         | 1.522 | 1.396 | 1.428 | 1.102 | 1.216 | 1.148 | 1.108 | 1.215 |
| 33                         | 1.569 | 1.070 | 1.371 | 1.360 | 1.271 | 1.260 | 1.152 | 1.366 |
| 34                         | 1.518 | 1.429 | 1.211 | 1.067 | 1.165 | 1.178 | 1.132 | 1.391 |
| 35                         | 1.512 | 1.674 | 1.352 | 1.445 | 1.165 | 1.170 | 1.184 | 1.116 |
| 36                         | 1.463 | 1.223 | 1.557 | 1.245 | 1.229 | 1.251 | 1.141 | 1.353 |
| 37                         | 1.929 | 1.125 | 1.152 | 1.141 | 1.310 | 1.254 | 1.261 | 1.146 |
| 38                         | 1.310 | 1.075 | 1.489 | 1.534 | 1.196 | 1.259 | 1.401 | 1.276 |
| 39                         | 2.156 | 1.354 | 1.323 | 1.311 | 1.22  | 1.073 | 1.167 | 1.095 |

|    |       |       |       |       |       |       |       |       |
|----|-------|-------|-------|-------|-------|-------|-------|-------|
| 40 | 1.691 | 1.476 | 1.451 | 1.134 | 1.206 | 1.256 | 1.178 | 1.184 |
| 41 | 1.400 | 1.001 | 1.305 | 1.201 | 1.177 | 1.205 | 1.182 | 1.057 |
| 42 | 1.298 | 1.300 | 1.328 | 1.218 | 1.117 | 1.134 | 1.148 | 1.005 |
| 43 | 1.488 | 1.160 | 1.309 | 1.177 | 1.250 | 1.180 | 1.085 | 1.205 |
| 44 | 1.794 | 1.143 | 1.229 | 1.269 | 1.177 | 1.294 | 1.038 | 1.164 |
| 45 | 1.336 | 1.899 | 1.503 | 1.230 | 1.224 | 1.241 | 1.200 | 0.929 |
| 46 | 1.289 | 1.211 | 1.309 | 1.275 | 1.266 | 1.222 | 1.200 | 0.983 |
| 47 | 1.851 | 1.565 | 1.278 | 1.277 | 1.299 | 1.224 | 1.135 | 0.940 |
| 48 | 1.374 | 1.406 | 1.390 | 1.297 | 1.230 | 1.291 | 1.058 | 1.338 |
| 49 | 1.465 | 1.236 | 1.250 | 1.296 | 1.207 | 1.277 | 1.217 | 1.057 |
| 50 | 1.231 | 1.318 | 1.200 | 1.199 | 1.185 | 1.177 | 1.068 | 1.087 |
| 51 | 1.259 | 1.434 | 1.258 | 1.206 | 1.205 | 1.276 | 1.115 | 1.184 |
| 52 | 1.538 | 1.351 | 1.361 | 1.133 | 1.161 | 1.191 | 1.064 | 1.210 |
| 53 | 1.267 | 1.227 | 1.326 | 1.255 | 1.100 | 1.148 | 1.189 | 0.994 |
| 54 | 1.538 | 1.313 | 1.304 | 1.224 | 1.289 | 1.171 | 1.227 | 1.125 |
| 55 | 0.900 | 1.290 | 1.244 | 1.320 | 1.091 | 1.109 | 0.993 | 1.242 |
| 56 | 1.344 | 1.251 | 1.388 | 1.115 | 1.245 | 1.216 | 1.268 | 1.235 |
| 57 | 2.059 | 1.501 | 1.462 | 1.165 | 1.054 | 1.240 | 1.197 | 1.290 |
| 58 | 1.615 | 1.443 | 1.326 | 1.310 | 1.217 | 1.290 | 1.011 | 1.072 |
| 59 | 1.567 | 1.286 | 1.270 | 1.349 | 1.185 | 1.235 | 1.236 | 1.149 |
| 60 | 1.914 | 1.361 | 1.274 | 1.089 | 1.242 | 1.244 | 1.081 | 1.220 |
| 61 | 1.745 | 1.301 | 1.533 | 1.208 | 1.427 | 1.268 | 1.215 | 1.314 |
| 62 | 2.173 | 1.157 | 1.449 | 1.312 | 1.183 | 1.219 | 1.075 | 1.293 |
| 63 | 1.417 | 1.240 | 1.452 | 1.281 | 1.140 | 1.127 | 1.090 | 1.327 |
| 64 | 1.103 | 1.458 | 1.224 | 1.318 | 1.174 | 1.178 | 1.121 | 1.412 |
| 65 | 1.592 | 1.402 | 1.087 | 1.277 | 1.197 | 1.111 | 1.218 | 1.202 |
| 66 | 1.273 | 1.114 | 1.360 | 1.195 | 1.250 | 1.223 | 1.180 | 1.293 |
| 67 | 1.900 | 1.195 | 1.520 | 1.358 | 1.213 | 1.273 | 1.283 | 1.281 |
| 68 | 0.948 | 1.288 | 1.381 | 1.104 | 1.137 | 1.247 | 1.138 | 1.172 |
| 69 | 1.481 | 1.241 | 1.265 | 1.197 | 1.259 | 1.349 | 1.139 | 1.260 |
| 70 | 1.257 | 1.422 | 1.081 | 1.127 | 1.240 | 1.277 | 1.008 | 1.240 |
| 71 | 1.474 | 1.184 | 1.457 | 1.276 | 1.216 | 1.203 | 1.020 | 1.284 |
| 72 | 1.475 | 1.482 | 1.149 | 1.324 | 1.146 | 1.139 | 1.390 | 1.279 |
| 73 | 1.813 | 1.566 | 1.204 | 1.252 | 1.234 | 1.305 | 1.127 | 1.173 |
| 74 | 0.979 | 1.447 | 1.302 | 1.164 | 1.235 | 1.195 | 1.321 | 1.099 |
| 75 | 1.846 | 1.509 | 1.288 | 1.238 | 1.192 | 1.270 | 1.370 | 1.197 |
| 76 | 1.683 | 1.342 | 1.352 | 1.131 | 1.214 | 1.268 | 0.942 | 1.037 |
| 77 | 1.591 | 1.149 | 1.307 | 1.085 | 1.239 | 1.254 | 1.237 | 1.247 |
| 78 | 1.407 | 1.061 | 1.054 | 1.216 | 1.167 | 1.328 | 1.199 | 1.133 |
| 79 | 1.319 | 1.441 | 1.374 | 1.206 | 1.232 | 1.280 | 1.386 | 1.191 |
| 80 | 1.826 | 1.232 | 1.580 | 1.440 | 1.180 | 1.223 | 1.202 | 1.187 |
| 81 | 1.577 | 1.337 | 1.360 | 1.230 | 1.093 | 1.225 | 1.153 | 1.101 |
| 82 | 1.269 | 1.289 | 1.355 | 1.236 | 1.147 | 1.203 | 1.146 | 1.248 |
| 83 | 1.789 | 1.464 | 1.307 | 1.162 | 1.264 | 1.260 | 1.086 | 1.067 |
| 84 | 1.220 | 1.322 | 1.443 | 1.210 | 1.272 | 1.232 | 1.152 | 1.072 |
